# Supplementary material
Source: publisher site journal article supplement (https://www.dovepress.com/article/493708)
Supplement: Supplementary file 1 [file get_supplementary_file.php]

**Table S1** Heterogeneity was tested using Cochrane Q statistics

| Method | Q | Q_df | Q_pval |
| --- | --- | --- | --- |
| MR Egger | 19.38313 | 16 | 0.2492965 |
| Inverse variance weighted | 20.10962 | 17 | 0.2686608 |

**Table S2** A pleiotropic test was performed using MR Egger regression

| Method | egger_intercept | se | *P*value |
| --- | --- | --- | --- |
| MR Egger | -0.009018918 | 0.01164641 | 0.4499903 |


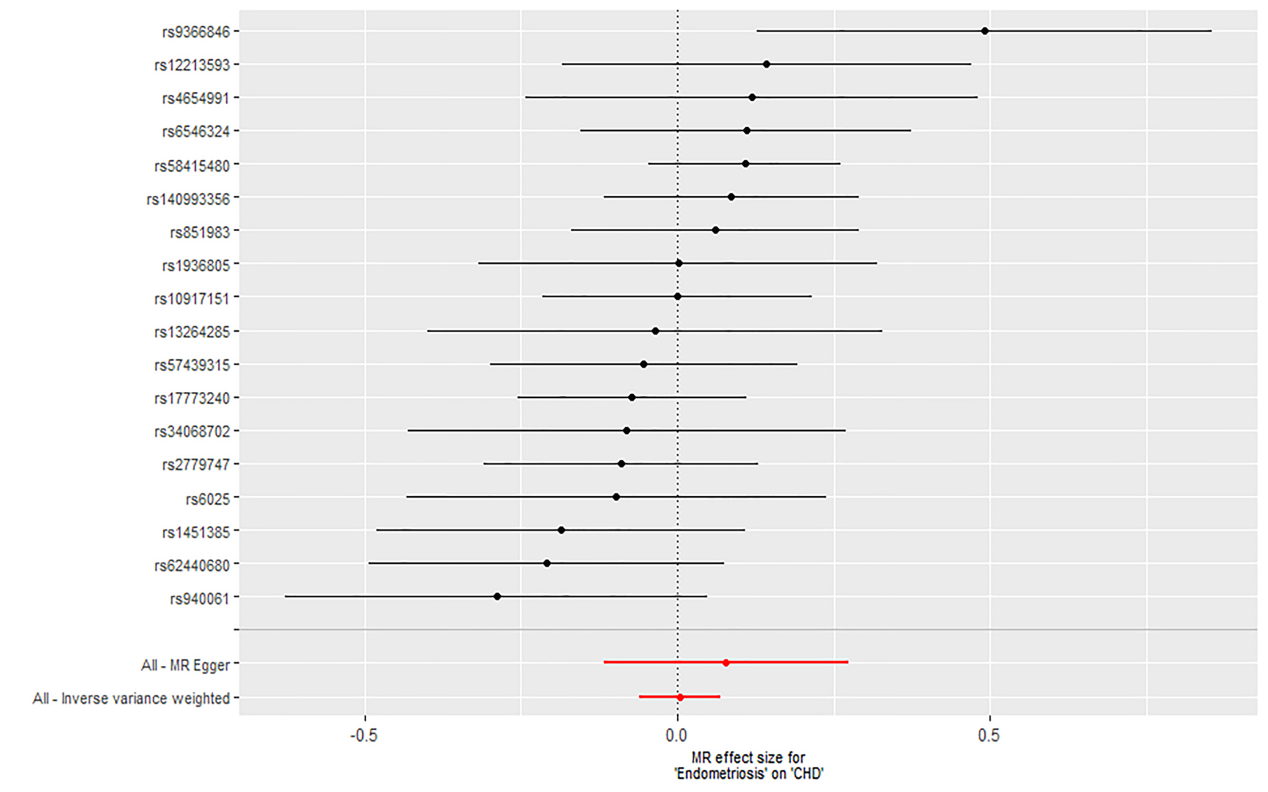


**Figure S1.** The forest plot of SNPs


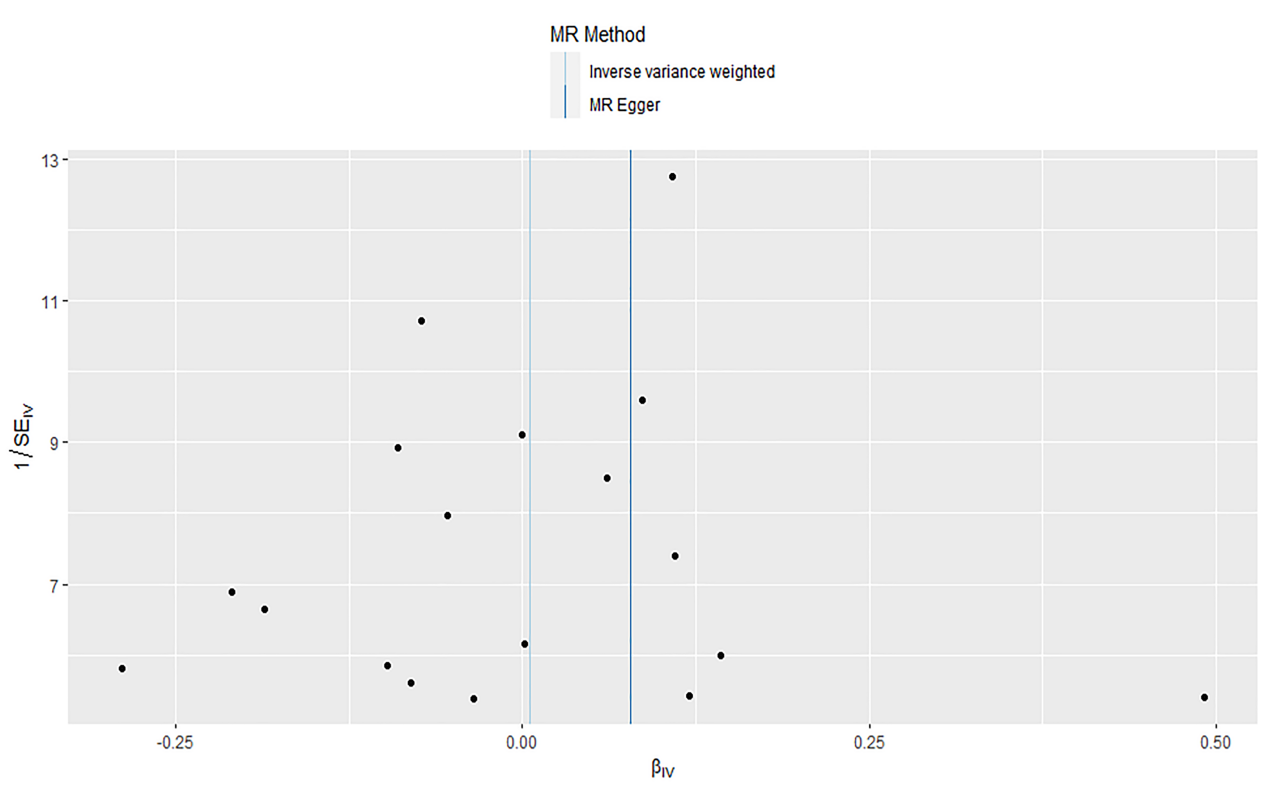


**Figure S2.** The funnel plot of two-sample MR analysis


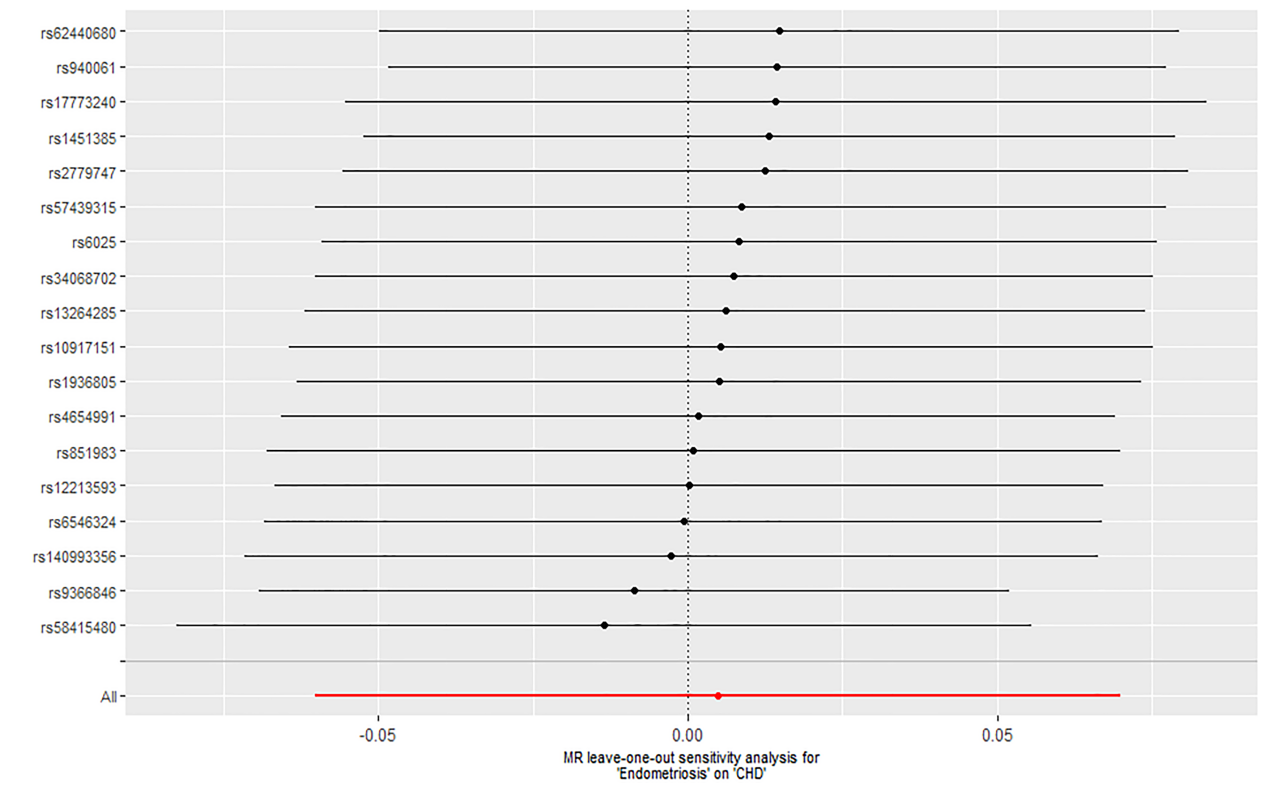


**Figure S3.** The forest plot of the "leave-one-out" analysis
